RESEARCH ARTICLE

# OVATE Family Protein 8 Positively Mediates Brassinosteroid Signaling through Interacting with the GSK3-like Kinase in Rice

Chao Yang<sup>1</sup>\*, Wenjin Shen<sup>1</sup>\*, Yong He<sup>2,3</sup>, Zhihong Tian<sup>2,3\*</sup>, Jianxiang Li<sup>1,2\*</sup>

**1** University of Chinese Academy of Sciences, Key Laboratory of South China Agricultural Plant Molecular Analysis and Genetic Improvement, and Guangdong Provincial Key Laboratory of Applied Botany, South China Botanical Garden, Chinese Academy of Sciences, Guangzhou, China, **2** College of Life Science, Yangtze University, Jingzhou, China, **3** Hubei Collaborative Innovation Center for Grain Industry, Yangtze University, Jingzhou, China

\* These authors contributed equally to this work.

\* [zhtian@yangtzeu.edu.cn](mailto:zhtian@yangtzeu.edu.cn) (ZT); [jxli@scbg.ac.cn](mailto:jxli@scbg.ac.cn) (JL)

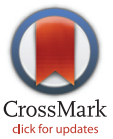

CrossMark  
click for updates

 OPEN ACCESS

**Citation:** Yang C, Shen W, He Y, Tian Z, Li J (2016) OVATE Family Protein 8 Positively Mediates Brassinosteroid Signaling through Interacting with the GSK3-like Kinase in Rice. *PLoS Genet* 12(6): e1006118. doi:10.1371/journal.pgen.1006118

**Editor:** Sarah Hake, University of California Berkeley, UNITED STATES

**Received:** December 14, 2015

**Accepted:** May 20, 2016

**Published:** June 22, 2016

**Copyright:** © 2016 Yang et al. This is an open access article distributed under the terms of the [Creative Commons Attribution License](https://creativecommons.org/licenses/by/4.0/), which permits unrestricted use, distribution, and reproduction in any medium, provided the original author and source are credited.

**Data Availability Statement:** All relevant data are within the paper and its Supporting Information files.

**Funding:** This work was supported by grants from the Natural Science Foundation of Guangdong Province (2014A030310080 and 2016A030313153) and the fund for Improvement of Modern Seed Industry from Department of Agriculture of Guangdong Province (Y434121002). The funders had no role in study design, data collection and analysis, decision to publish, or preparation of the manuscript.

## Abstract

*OVATE* gene was first identified as a key regulator of fruit shape in tomato. *OVATE* family proteins (OFPs) are characterized as plant-specific transcription factors and conserved in *Arabidopsis*, tomato, and rice. Roles of OFPs involved in plant development and growth are largely unknown. Brassinosteroids (BRs) are a class of steroid hormones involved in diverse biological functions. *OsGKS2* plays a critical role in BR signaling by phosphorylating downstream components such as *OsBZR1* and *DLT*. Here we report in rice that *OsOFP8* plays a positive role in BR signaling pathway. BL treatment induced the expression of *OsOFP8* and led to enhanced accumulation of *OsOFP8* protein. The gain-of-function mutant *Osopf8* and *OsOFP8* overexpression lines showed enhanced lamina joint inclination, whereas *OsOFP8* RNAi transgenic lines showed more upright leaf phenotype, which suggest that *OsOFP8* is involved in BR responses. Further analyses indicated that *OsGSK2* interacts with and phosphorylates *OsOFP8*. BRZ treatment resulted in the cytoplasmic distribution of *OsOFP8*, and bikinin treatment reduced the cytoplasmic accumulation of *OsOFP8*. Phosphorylation of *OsOFP8* by *OsGSK2* is needed for its nuclear export. The phosphorylated *OsOFP8* shuttles to the cytoplasm and is targeted for proteasomal degradation. These results indicate that *OsOFP8* is a substrate of *OsGSK2* and the function of *OsOFP8* in plant growth and development is at least partly through the BR signaling pathway.

## Author Summary

*OVATE* family proteins (OFPs) are characterized as plant-specific transcription factors and mainly function in affecting fruit shape, but the molecular mechanisms by which they function are largely unknown. Rice genome contains 31 OFPs, the roles of these *OsOFPs* involved in plant development and growth are not understood. Brassinosteroids (BRs) are

**Competing Interests:** The authors have declared that no competing interests exist.

a class of steroid hormones involved in diverse biological functions. Here we report in rice that *OsOFP8* plays a positive role in BR signaling pathway by interacting with *OsGKS2*, a negative regulator in BR signaling pathway. Our results shed light on studying the functions of OFPs and provide a chance to explore the new components of BR signaling pathway.

## Introduction

*OVATE* gene was first cloned in tomato and demonstrated to encode a hydrophilic protein with putative bipartite nuclear localization signal, and a C-terminal domain of approximate 70 amino acids which is designated as the *OVATE* domain and conserved in tomato, *Arabidopsis*, and rice [1–3]. As a plant-specific transcription factor family, *OVATE* family proteins (OFPs) control multiple aspects of plant growth and development [2, 4–6]. Sequence analysis showed that there are 18 *OVATE* genes in the *Arabidopsis* genome [2, 5–7]. *AtOFP1* was shown to function as an active transcriptional repressor to suppress cell elongation [2]. *Arabidopsis* plants overexpressing *AtOFP1* exhibited abnormal morphological phenotypes because *AtOFP1* suppresses the expression of *AtGA20ox1*, the key gibberellin (GA) biosynthesis enzyme gene [2]. *AtOFP4* was reported to interact with *KNAT7* (Knotted1-Like Homeodomain Protein 7) *in planta*, this interaction enhances *KNAT7*'s transcriptional repression activity and regulates the secondary cell wall formation [5]. *AtOFP5* is required for normal embryo sac development in *Arabidopsis* by suppressing the activity of BELL-KNOX TALE complexes [7].

In rice, there are 31 putative OFPs identified in the genome [3]. Although increasing evidence in *Arabidopsis* demonstrates that *AtOFPs* participate in multiple aspects of plant growth and development by regulating the transcriptional levels of target genes, little is known about the function and action mode of *OsOFPs* in rice.

Brassinosteroids (BRs) are a class of plant-specific steroidal hormones that are structurally related to animal and insect steroids. As a group of growth-promoting steroid hormones, BRs play pivotal roles in promoting cell expansion and division, regulating senescence, male fertility, fruit ripening, and modulating plant responses to various environmental signals [8]. Extensive studies in *Arabidopsis* have identified a nearly complete BR signaling pathway starting with *BRI1* (Brassinosteroid insensitive 1) as the cell membrane receptor which perceives and binds to BR [9], then initiating a phosphorylation-mediated cascade involving *BSK1* (BR-signaling kinase 1), *BSU1* (*BRI1* suppressor 1), *BIN2* (BR-insensitive 2), and *PP2A* (Protein phosphatase 2A), and finally transducing the extracellular signal to the transcription factor *BZR1* (Brassinazole resistant 1) [10–13]. In this signaling pathway, *BIN2* acts as a negative regulator that interacts with and phosphorylates *BZR1* to inhibit its function, thereby blocking BR signaling [14, 15]. *BIN2* can also phosphorylate Auxin Response Factor 2 (*ARF2*), resulting in the inhibition of the DNA binding activity of *ARF2*, thus promoting downstream auxin responses [16]. In addition, BR regulates stomatal development through *BIN2*-mediated phosphorylation of *YDA*, a mitogen-activated protein kinase kinasekinase (*MAPKKK*) [17, 18]. These studies indicated that *BIN2* acts as a multi-tasker in diverse cellular signal transduction pathways [19].

In rice, *OsGSK2* is the counterpart of *Arabidopsis* *BIN2*, and acts as a negative regulator to mediate BR signaling [20]. The phosphorylated form of *OsBZR1* was increased in *OsGSK2* overexpression plants, and decreased in *OsGSK2* RNAi plants, suggesting that *OsGSK2* mediates BR signaling through *OsBZR1* [20]. In addition to *OsBZR1*, two other proteins in rice have been found as substrates for *OsGSK2*. *DLT* (Dwarf and Low-Tillering), encoding a GRAS-family protein, is a direct target of *OsGSK2* and functions similarly to *OsBZR1* [20–22].

In contrast to DLT, OsLIC (LEAF and TILLER ANGLE INCREASED CONTROLLER), another substrate of OsGSK2, acts as an antagonistic transcription factor of OsBZR1 and plays a negative role in BR signaling [23]. These studies suggested the vital role of OsGSK2 in BR signaling.

We report here the characteristics of *OsOFP8*, a member of OVATE family protein genes in rice. The gain-of-function mutant *Osofp8* and *OsOFP8* overexpression transgenic lines showed enhanced lamina joint bending, whereas *OsOFP8* RNAi lines showed upright leaves and tight architecture. Further analysis revealed that OsGSK2 interacts with and phosphorylates *OsOFP8*, and phosphorylated *OsOFP8* shuttles to the cytoplasm and is targeted for the proteasomal degradation.

## Results

### Increase in *OsOFP8* expression results in lamina joint bending phenotype

In the experiment of generation of T-DNA mutants, we identified a T-DNA insertion mutant showing lamina joint bending phenotype at the maturation stage, especially for the flag leaves (Fig 1A). To identify the gene in which T-DNA was inserted, we performed TAIL-PCR analysis

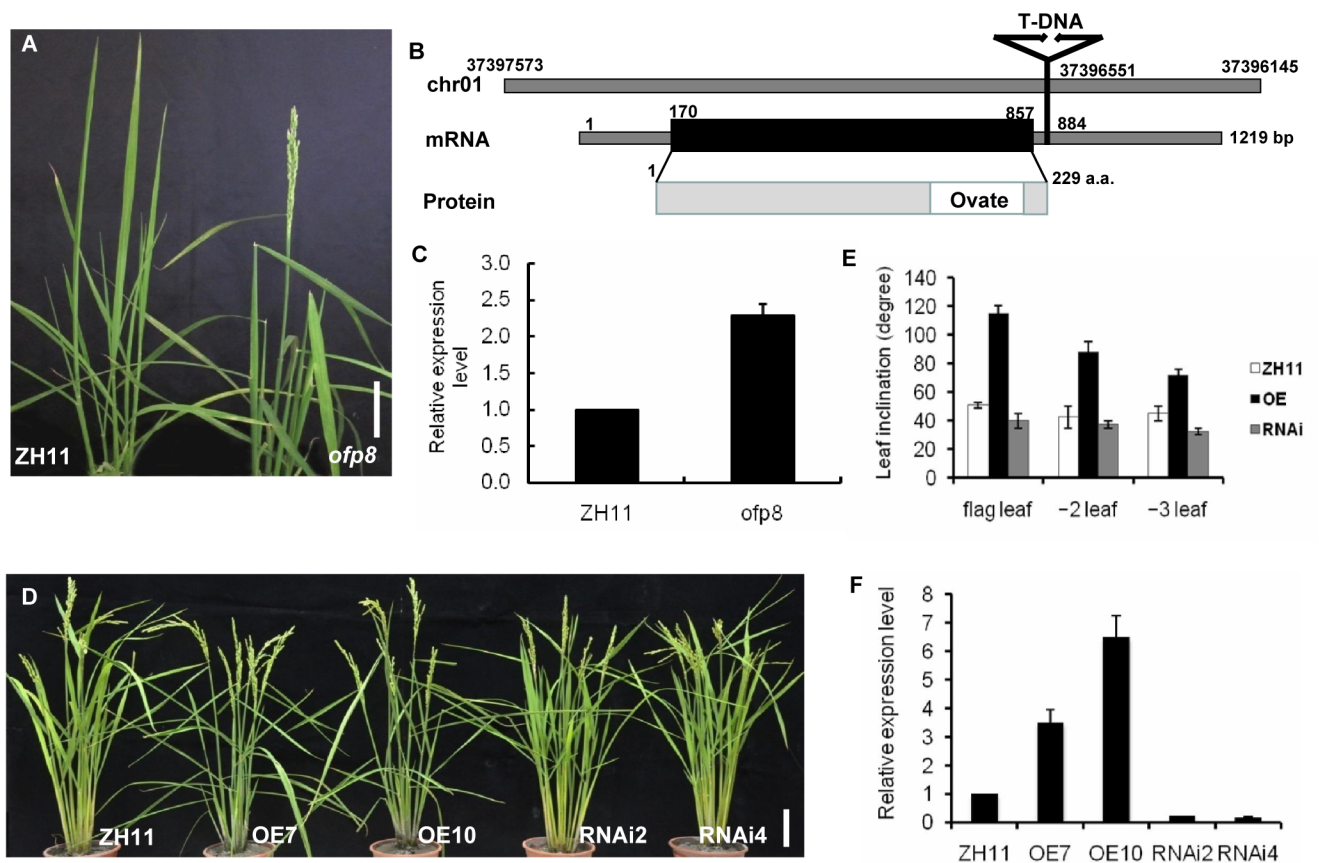

**Fig 1. Phenotypes of *Osofp8* mutant, *OsOFP8*-OE plants, and *OsOFP8*-RNAi plants.** (A) Gross morphology of *Osofp8* mutant compared with the wild-type (ZH11). Bars = 10 cm. (B) Schematic structure of *OsOFP8* gene. *OsOFP8* is an intronless gene encoding a protein of 229 amino acids. The T-DNA insertion site is located at the 27 bp downstream of the stop codon of the *OsOFP8* gene and indicated by an insertion tag. (C) Relative transcript level of *OsOFP8* in ZH11 and *Osofp8* mutant plants. Two-week-old seedlings of ZH11 and *Osofp8* mutant plants were used for qRT-PCR analysis. *OsActin 1* was used as a control. (D) Gross morphology of *OsOFP8*-overexpression lines (OE7 and 17), *OsOFP8*-RNAi lines (RNAi2 and 4), and ZH11 plants. Bars = 10 cm. (E) Leaf inclination of the last three leaves at the heading stage of ZH11, *OsOFP8*-OE, and *OsOFP8*-RNAi lines. The leaf angles were measured in duplicate with five plants for each type of plants, and data are presented as mean  $\pm$  SE. (F) qRT-PCR analysis of *OsOFP8* expression in different *OsOFP8*-OE and *OsOFP8*-RNAi lines compared with ZH11. Two-week-old seedlings were used for the analysis. *OsActin 1* was used as an internal control.

doi:10.1371/journal.pgen.1006118.g001

[24], DNA sequence comparison showed that the T-DNA was inserted into the 3' region of LOC\_Os01g64430 at the site of 27 bp downstream of the stop codon (Fig 1B), and there is no other annotated genes in the 5.5 kb region downstream of LOC\_Os01g64430 (<http://rice.plantbiology.msu.edu>). LOC\_Os01g64430 encodes an OVATE family protein (hereafter designated as OsOFP8). To investigate the effect of T-DNA insertion on the expression of *OsOFP8*, we carried out quantitative real-time RT-PCR (qRT-PCR), which showed that T-DNA insertion causes an increase in the expression of *OsOFP8* (Fig 1C), thus T-DNA insertion generates a gain-of-function mutant *Osofp8*.

To further investigate the function of *OsOFP8* gene, we generated both *OsOFP8* overexpression and RNA-interference (RNAi) transgenic lines. *OsOFP8* overexpression lines OE7 and OE10 phenocopied the *Osofp8* mutant, showing increased lamina joint bending phenotype, by contrast, RNAi transgenic lines RNAi2 and RNAi4 showed upright leaves and tight architecture (Fig 1D). Furthermore, we examined the leaf inclination degrees of the three uppermost leaves. Compared to the wild-type (WT) plants, *OsOFP8* overexpression plants showed largely increased leaf inclination for all three uppermost leaves, and the flag leaf showed the largest inclination angle, by contrast, RNAi transgenic plants showed reduced leaf angles (Fig 1E). Expression analysis by qRT-PCR showed that *OsOFP8* expression was increased in overexpression lines and reduced in RNAi lines (Fig 1F). Tissue-specific expression of OsOFP8 was examined by qRT-PCR analysis, showing that *OsOFP8* was expressed in various tissues (S1A Fig). Native promoter of *OsOFP8* was fused to *GUS* gene to gain expression profile of *OsOFP8*, *GUS* activity was detected in different organs including roots, stem, leaf, lamina joint, inflorescence, and seeds (S1B–S1J Fig).

## OsOFP8 positively functions in BR pathway

Gain-of-function *Osofp8* mutant and *OsOFP8* overexpression lines showed obvious leaf lamina joint bending phenotype, which is a classic phenotype of BR response. We hypothesized that *OsOFP8* may be involved in BR signaling pathway. To this end, we tested the sensitivity of wild-type plants, *OsOFP8* overexpression and RNAi lines to 24-epibrassinolide (BL) in lamina joint bending experiments. BL treatment caused a dose-dependent lamina joint inclination in both WT and OE10 with the latter plants were more sensitive to BL treatment, whereas RNAi4 plants were insensitive to BL treatment (Fig 2A and 2B). To further confirm this phenomenon, lamina joint assay was performed in the dark-grown seedlings by the excised leaf segment method [22]. We observed more severe inclination of leaf angle in OE10 than in WT plants, whereas RNAi4 plants did not show too much change in leaf angle when treated with BL (Fig 2C).

To investigate the effect of *OsOFP8* on the expression of BR-related gene expression, we analyzed the expression levels of genes involved in BR biosynthesis and signaling. Rice *D2/CYP90D2* (*OsD2*) gene is involved in the last step of brassinosteroid biosynthesis [25], and *OsDWARF4/CYP90B2* functions in the rate-limiting step of brassinosteroid biosynthesis [26]. Overexpression of *OsOFP8* suppressed the expression level of *OsD2* but had little effect on the expression of *OsDWARF4*, whereas knockdown of *OsOFP8* expression by RNAi led to significantly increased expression of *OsD2* and *OsDWARF4* (Fig 2D). *OsOFP8* had little effect on the expression of *OsGSK2*, a negative regulator gene in BR signaling, by contrast, the expression levels of *OsBZRI*, a positive controller in BR signaling, were increased in *OsOFP8* overexpression lines and significantly decreased in *OsOFP8* RNAi lines (Fig 2D). We also measured the expression of *OsOFP8* in BR signaling. BL treatment induced the mRNA transcript of *OsOFP8* (Fig 2E). To further investigate the effect of BR signaling on *OsOFP8* expression, we first treated the *OsOFP8-YFP* transfected protoplast cells with BRZ for 12 hr, and then BL was applied after the removal of BRZ. The protein level of *OsOFP8* was induced by BL treatment (Fig 2F).



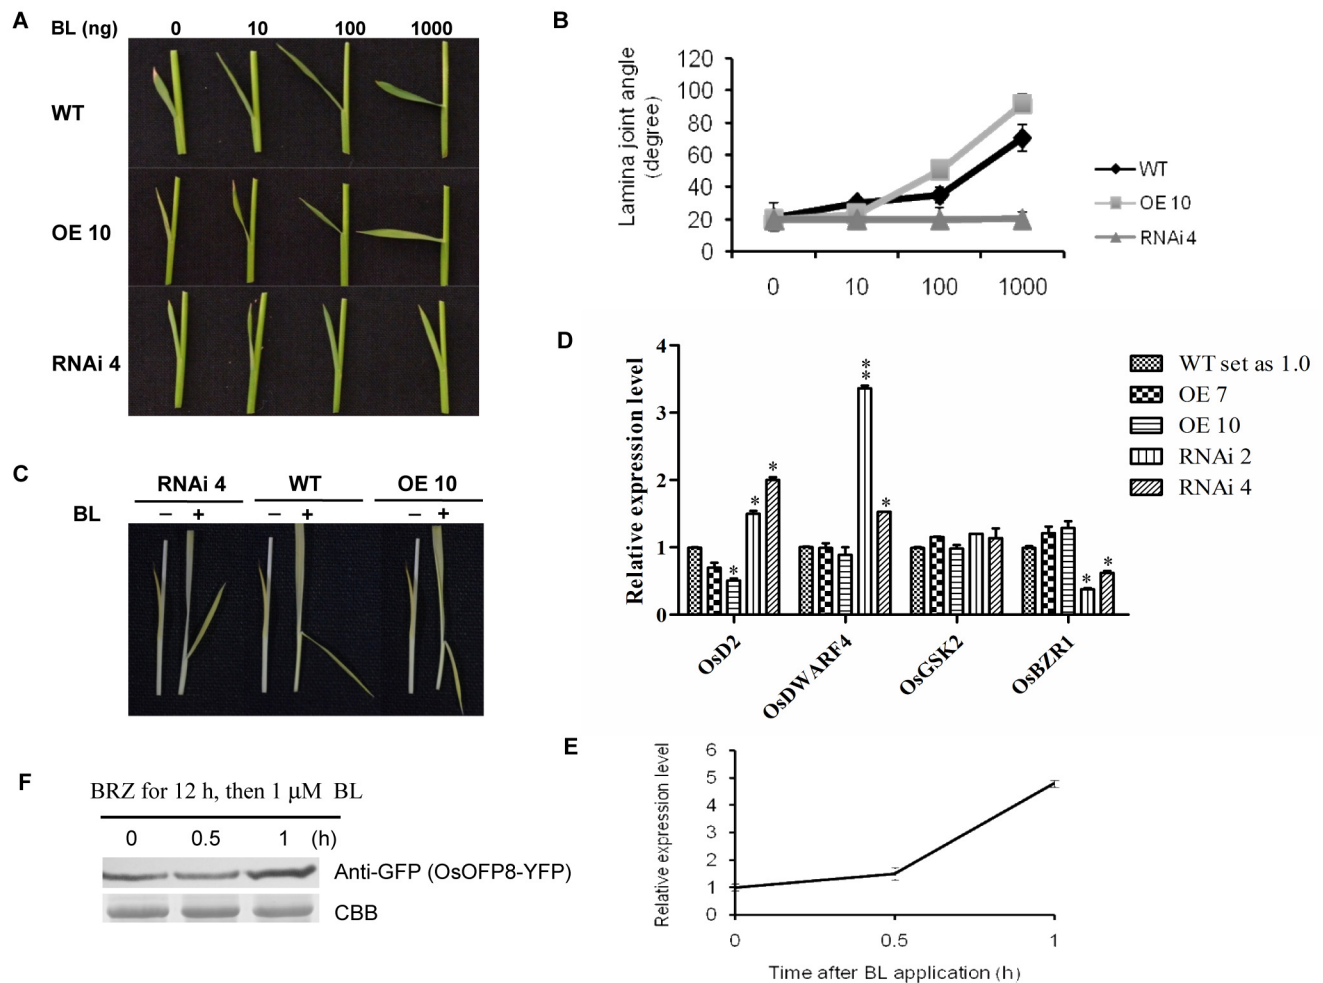

**Fig 2. OsOFP8 is a positive regulator in BR signaling in rice.** (A) Lamina joint bending response to various amounts of 24-epiBL by the micro-drop method. A drop of ethanol (1  $\mu$ L) containing 0, 10, 100 or 1000 ng of 24-epiBL, respectively, was spotted onto the top of the lamina of seedlings which were germinated for 2 days and grown for 3 days at 30°C. Images were obtained after 3 days of incubation. (B) Statistical data for lamina joint bending angle assay described in (A). The leaf angle assay was performed in two biological repeats, and each repeat with five plants measured for each concentration and each type of plants. Data are presented as mean  $\pm$  SE. (C) Lamina joint bending response to 1  $\mu$ M 24-epiBL by the excised leaf segment method. Seeds were germinated for 2 days and then grown in the dark for 8 days at 30°C. Segments comprising of a part of the second leaf blade, lamina joint, and leaf sheath were floated on distilled water for 24 h and then incubated in 1  $\mu$ M 24-epiBL for 48 h in the dark. The experiments were performed in triplicate with similar results. (D) qRT-PCR analysis of the expression level of *OsD2*, *OsDWARF4*, *OsGSK2*, and *OsBZR1* genes in WT, *OsOFP8*-OE, and *OsOFP8*-RNAi plants. Two-week-old seedlings were used for analysis, which was performed in three biological repeats, each with three seedlings. Data represent mean  $\pm$  SE, \*,  $p < 0.05$ ; \*\*,  $p < 0.01$ , t-test. *OsActin 1* was used as a control. (E) qRT-PCR analysis of the expression level of *OsOFP8* under the treatment of 1  $\mu$ M 24-epiBL. Two-week-old seedlings were used for analysis with two biological repeats, each repeat having three seedlings for control and treatment, respectively. Data represent mean  $\pm$  SE. (F) BR signaling induces *OsOFP8* protein accumulation. *Arabidopsis* protoplast cells were transfected with *OsOFP8-YFP* and treated with 10  $\mu$ M BRZ for 12 hours (h). After the treatment, BRZ was washed off, and then the cells were treated with 1  $\mu$ M BL and harvested at the indicated time points, the protein was extracted from the harvested cells and used for western blotting, YFP antibody was used to detect *OsOFP8* protein. CBB, Coomassie Brilliant Blue.

doi:10.1371/journal.pgen.1006118.g002

## OsGSK2 interacts with and phosphorylates OsOFP8

The different responses of *OsOFP8* overexpression and RNAi plants to BL treatment prompted us to further explore the possible functions of *OsOFP8* in BR signaling pathway. We performed yeast two-hybrid (Y2H) analysis to test the interactions between *OsOFP8* and the components of BR signaling. *OsGSK2*, *OsBZR1*, and *DLT* are three important components in BR signaling

pathway, we investigated the possible interactions between OsOFP8 and these three components. Y2H analysis showed that OsOFP8 interacted with OsGSK2, but not with OsBZR1 and DLT (Fig 3A). The interaction between OsOFP8 and OsGSK2 required the full length of OsOFP8 because neither the N-terminal nor the OVATE domain-containing C-terminal of OsOFP8 interacts with OsGSK2 (S2A and S2B Fig). The interaction between OsOFP8 and OsGSK2 was also confirmed by the coimmunoprecipitation (Co-IP) assay. The HA-tagged OsGSK2 protein (3HA-OsGSK2) and YFP-tagged OsOFP8 protein (OsOFP8-YFP) were co-transfected into *Arabidopsis* protoplast cells, the fusion protein 3HA-OsGSK2 can be immunoprecipitated by OsOFP8-YFP fusion but not by YFP protein (Fig 3B). Furthermore, BiFC assay was used to confirm the interaction between OsOFP8 and OsGSK2 (Fig 3C).

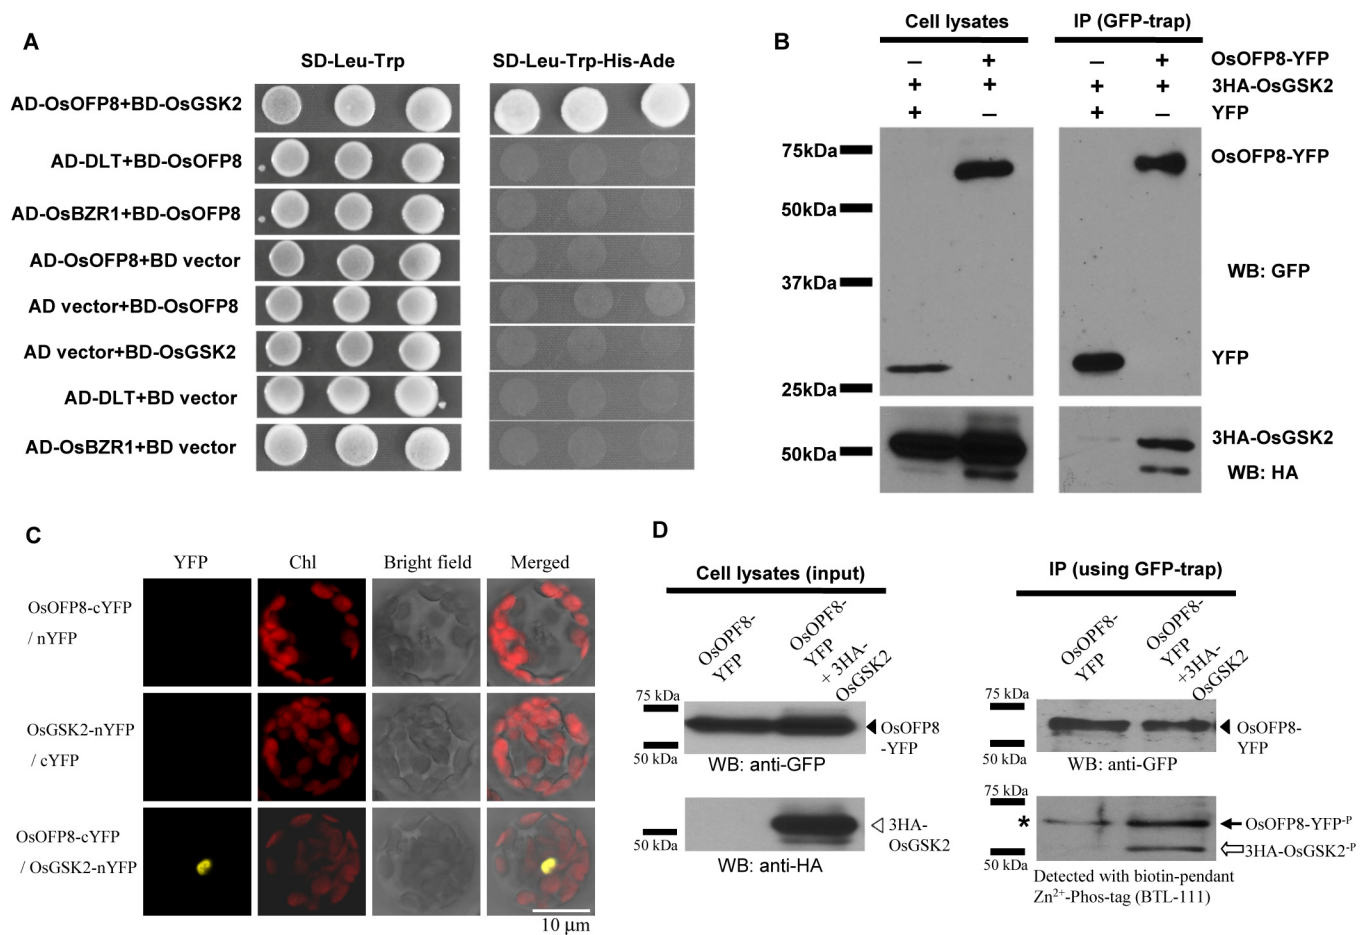

**Fig 3. OsGSK2 interacts with and phosphorylates OsOFP8.** (A) Yeast two-hybrid analysis for the interaction between OsOFP8 and OsGSK2, DLT, and OsBZR1. Co-transformed yeast clones were placed on SD dropout plates to detect the interactions. SD-Leu-Trp: synthetic complete medium lacking Leu and Trp for co-transformation detection. SD-Leu-Trp-His-Ade: synthetic complete medium lacking Trp, Leu, His and Ade for interaction detection. (B) Immunoprecipitation (IP) assay shows that OsOFP8 is in association with OsGSK2. *Arabidopsis* protoplasts expressing either YFP and 3HA-OsGSK2 or OsOFP8-YFP and 3HA-OsGSK2 were subjected to protein extraction. The Input (cell lysate) and IP were immunoblotted with indicated antibodies. WB: GFP indicates western blotting with GFP antibody. WB: HA indicates western blotting with HA antibody. (C) BiFC assay shows the interaction between OsOFP8 and OsGSK2. Chl means chlorophyll. (D) OsOFP8 phosphorylation analysis. *Arabidopsis* protoplast cells expressing *OsOFP8-YFP* only or *OsOFP8-YFP* with 3HA-OsGSK2 were subjected to protein extraction and then immunoprecipitated with either GFP antibody (WB: anti-GFP) or HA antibody (WB: anti-HA). Phosphorylation was detected with biotin-pendant Zn<sup>2+</sup>-Phos-tag (BTL-111). Black and white arrowheads indicate OsOFP8-YFP and 3HA-OsGSK2, respectively. Black and white arrows indicate phosphorylated OsOFP8-YFP<sup>P</sup> and 3HA-OsGSK2<sup>P</sup>, respectively. \* represents the internally phosphorylated OsOFP8-YFP.

doi:10.1371/journal.pgen.1006118.g003

OsGSK2 protein phosphorylates proteins such as OsBZR1 and DLT with which it interacts [20]. In this scenario, we were interested to know whether OsGSK2 phosphorylates OsOFP8. To this end, we applied the biotin-pendant  $Zn^{2+}$ -phos-tag and horseradish peroxidase-conjugated streptavidin method [27] to investigate the phosphorylation status of OsOFP8 when *OsOFP8-YFP* was expressed alone or co-expressed with *3HA-OsGSK2* in *Arabidopsis* protoplast cells. When *OsOFP8-YFP* was expressed alone in the protoplast cells, we only detected a faint band showing phosphorylated OsOFP8 (Fig 3D, asterisk), which is probably caused by the endogenous BIN2 of the protoplast cells. When *OsOFP8-YFP* and *3HA-OsGSK2* were co-expressed in protoplast cells, a stronger band was detected, indicating the increased phosphorylation status of OsOFP8 (Fig 3D, black arrow). The lower band showed the phosphorylated OsGSK2 (Fig 3D), which can be used as an internal reference for the system. This assay showed that OsGSK2 is able to phosphorylate OsOFP8. GSK3 kinases recognize a conserved sequence for phosphorylation (S/TXXXS/T, where S/T is serine or threonine and X is any amino acid), for example, BZR1 protein has 25 serine/threonine residues potentially phosphorylated by BIN2 [28]. Examination of OsOFP8 protein sequence revealed that there are 25 GSK3 kinase phosphorylation sites at the N-terminal region of OsOFP8 (S2C Fig), further supporting the notion that OsGSK2 phosphorylates OsOFP8.

### OsOFP8 localizes to the nucleus and the phosphorylated OsOFP8 shuttles to the cytoplasm for proteasomal degradation

To investigate the subcellular localization of *OsOFP8*, we made various *OsOFP8* fusions in which YFP protein was fused to either the N-terminus or the C-terminus of *OsOFP8*, the fused *OsOFP8* protein was transiently expressed in *Arabidopsis* protoplast cells to monitor the localization of *OsOFP8*. This assay showed that *OsOFP8* localizes to the nucleus (Figs 4A, S3A and S3B). NLS-mCherry gene is expressed in the nucleus, the merged image of NLS-mCherry and *OsOFP8-YFP* showed that majority of *OsOFP8* exists in the nucleolus, which was indicated by the strong fluorescence intensity in the round structure of the nucleus and seen in the differential interference contrast (DIC) images (Fig 4B). In addition, the fluorescent signals of *OsOFP8-YFP* and NLS-mCherry were well overlapped, further supporting the nuclear localization of *OsOFP8* (Fig 4B).

To test whether the interaction with OsGSK2 alters subcellular localization of *OsOFP8*, we investigated the localization of *OsOFP8* in the presence of OsGSK2. Co-expression with OsGSK2 clearly caused the cytoplasmic distribution of *OsOFP8* (Fig 4C), and western blotting was carried out to show the presence of OsGSK2 (S3C Fig). A closer view of individual cells showed both the nuclear and cytoplasmic localization of *OsOFP8* (Fig 4D, upper panel), and analysis of the fluorescent signal peaks showed that only one peak of *OsOFP8-YFP* was overlapped with that of NLS-mCherry, and three other peaks of *OsOFP8-YFP* were detected in the cytosol (Fig 4D, lower panel). These results indicate that interaction with OsGSK2 leads to the nuclear export of *OsOFP8* to the cytoplasm.

To analyze the effect of BR signaling on the subcellular distribution of *OsOFP8*, we treated the *OsOFP8-YFP* transfected protoplast cells with BL. After BL treatment for two hours, the protein level of *OsOFP8* was increased in the nucleus, and *OsOFP8* was not detected in the cytoplasm (Fig 4E). When treated with BRZ, a BR biosynthetic inhibitor brassinazole, the protein level of *OsOFP8* was detected both in the nucleus and in the cytoplasm, indicating that BRZ treatment altered the subcellular localization of *OsOFP8* (Fig 4E). OsGSK2 interacts with and phosphorylates *OsOFP8*, the phosphorylation status of *OsOFP8* may be required for its nuclear export. To this end, we treated the protoplast cells co-transfected by *OsOFP8-YFP* and *3HA-OsGSK2* with bikinin which inhibits the activity of BIN2 by acting as an ATP competitor.

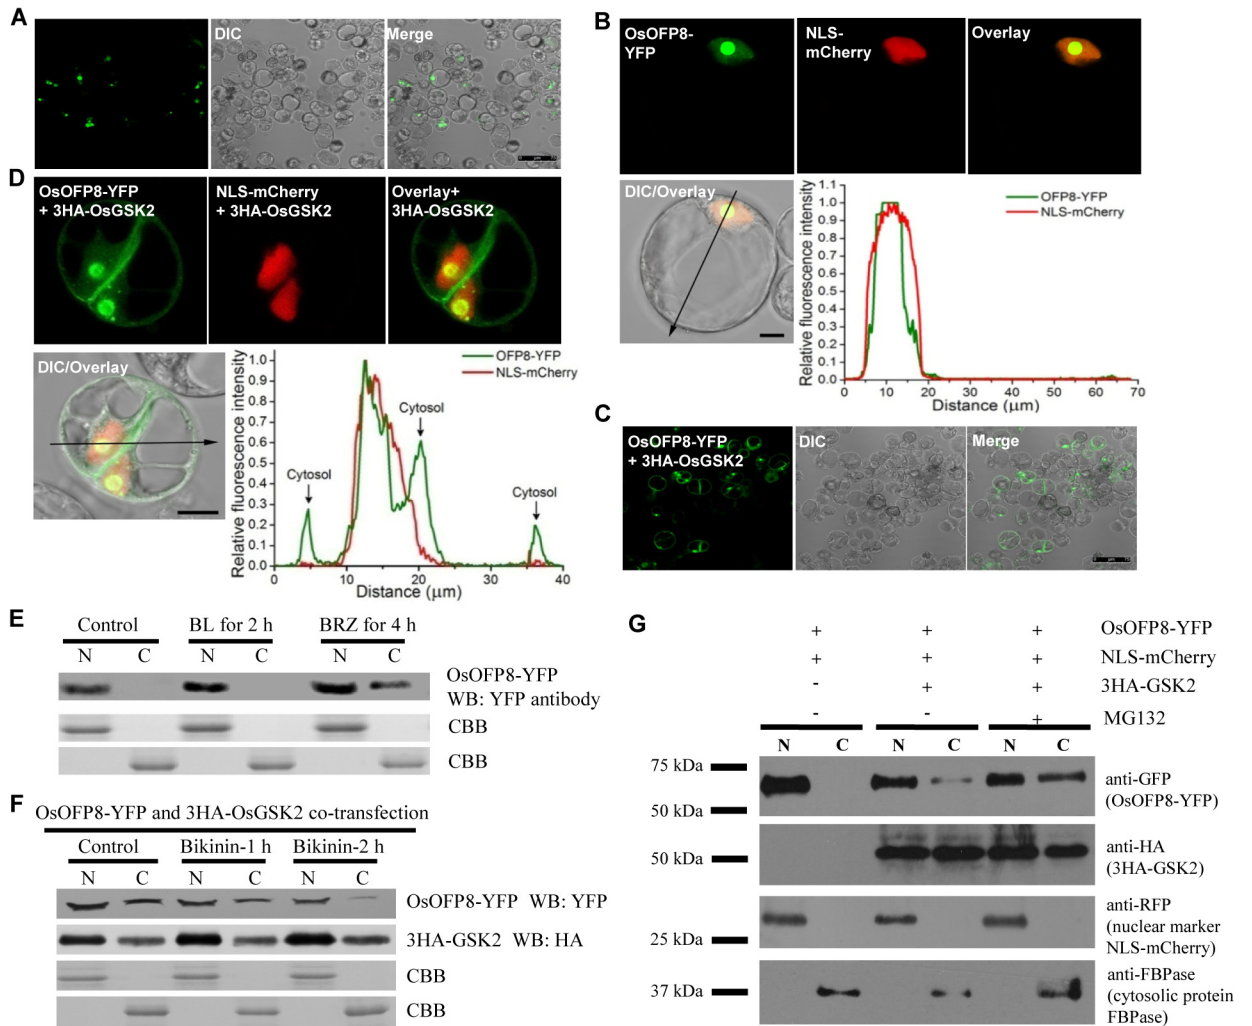

**Fig 4. Phosphorylated OsOFP8 shuttles to the cytoplasm for proteasome-mediated protein degradation.** (A) OsOFP8 locates to the nucleus. (B) A closer view of OsOFP8 distribution in the nucleus shows that OsOFP8 is predominantly located in the nucleolus. NLS-mCherry was used as a nuclear marker. The fluorescent signals were analyzed using LSM Image Browser Rel. 4.0 software, and the OsGSK2-YFP and NLS-mCherry signals match well in the nucleus (lower panel). (C) OsGSK2 leads to the nuclear export of OsOFP8. OsOFP8-YFP and 3HA-OsGSK2 were co-transfected into protoplast cells, and OsOFP8 is exported from the nucleus. (D) A closer view of the nuclear export of OsOFP8. NLS-mCherry was used as a nuclear marker. The fluorescent signal intensities of OsOFP8-YFP and NLS-mCherry were determined along the line drawn on the confocal images using LSM Image Browser Rel. 4.0 software. Different signal peaks of OsOFP8-YFP were detected in the nucleus and cytoplasm (lower panel). (E) The effect of BR and BRZ on the subcellular distribution of OsOFP8. Protoplast cells were transfected with OsOFP8-YFP, and then subjected to BL (1 μM) and BRZ (10 μM) treatment, respectively. Proteins were separately prepared from the nucleus and cytoplasm, and blotted with YFP antibody. N and C represent the nucleus and cytoplasm, respectively. WB stands for western blotting. CBB is for Coomassie Brilliant Blue. (F) Phosphorylation by OsGSK2 is needed for the nuclear export of OsOFP8. *Arabidopsis* protoplast cells were co-transfected with OsOFP8-YFP and 3HA-OsGSK2, the transfected cells were treated with bikinin (20 μM), and then harvested at the indicated time points for analysis. Proteins were separately extracted from the nucleus and cytoplasm, and then blotted with YFP and HA antibodies, respectively. N and C represent the nucleus and cytoplasm, respectively. WB stands for western blotting. CBB is for Coomassie Brilliant Blue. (G) Phosphorylated OsOFP8 shuttles to the cytoplasm for proteasomal degradation. OsOFP8-YFP combined with either 3HA-OsGSK2 or NLS-mCherry was used to transfect *Arabidopsis* protoplast cells, after incubation for 8–10 h, the cells were transferred to W5 solution with or without 10 μM MG132. The cytoplasmic and nuclear fractions from the protoplast cells were separated by centrifugation. The proteins were blotted with GFP and HA antibodies, respectively. MG132 treatment increased the amount of OsOFP8 in the cytoplasm. N and C stand for the nuclear and cytosolic fractions, respectively. NLS-mCherry and cytosolic protein FBPase were detected using anti-RFP and anti-FBPase, respectively.

doi:10.1371/journal.pgen.1006118.g004



Western blotting showed that the protein level of OsOFP8 in the cytoplasm was largely reduced when the cells were treated with bikinin for two hours, indicating that phosphorylation of OsOFP8 by OsGSK2 is needed for its cytoplasmic localization (Fig 4F). Because presence of OsGSK2 induced the nuclear export of OsOFP8 (Fig 4D and 4E), we further analyzed the state of OsOFP8 and the phosphorylated OsOFP8 in the nucleus and cytoplasm, respectively. Nuclear and cytoplasmic fractions were prepared both from the protoplasts co-transfected with *OsOFP8* and NLS-mCherry and with *OsOFP8* and *OsGSK2*. In the absence of OsGSK2, OsOFP8 was only detected in the nucleus, which is consistent with the previous findings (Fig 4A and 4E). In the presence of OsGSK2, OsOFP8 was detected both in the nucleus and in the cytoplasm, but the band in the cytoplasm was much weaker than that in the nucleus (Fig 4G). When the co-transfected protoplasts were treated with MG132, a proteasome inhibitor, the intensity of the band in the cytoplasm was increased (Fig 4G), which suggests that the phosphorylated OsOFP8 is cytoplasm-localized and targeted for proteasomal degradation.

## Discussion

The *OVATE* gene was first identified as a major QTL controlling pear-shaped fruit in tomato [1, 29], and later on, studies in *Arabidopsis* show that the *OVATE* family proteins control multiple aspects of plant growth and development [2, 4–6]. The rice genome contains more number of OFPs than the *Arabidopsis* genome, but very few studies on OFP function in rice have been reported. We studied the function of *OsOFP8* in rice, and demonstrated that *OsOFP8* is involved in BR signaling. Elevated expression of *OsOFP8* in rice leads to increased lamina joint bending phenotype and BR hypersensitivity (Fig 2).

In *Arabidopsis*, *Atofp1-1D* is a dominant, gain-of-function mutant, which has a T-DNA inserted at the 4332 bp downstream of the stop codon of the *AtOFP1* gene and shows increased expression of *AtOFP1* [2]. *Osofp8* is also a gain-of-function mutant with T-DNA inserted in the 3' region of *OsOFP8* gene and shows increased expression of *OsOFP8* gene (Fig 1). This coincidence of gain-of-function mutants generated by T-DNA insertion may imply a common mechanism regarding the expression regulation of OFP genes. In *Arabidopsis*, *Atofp1-1D* mutant shows reduced lengths in all aerial organs including hypocotyls, rosette leaf, inflorescence stem and floral organs. By contrast, the rice *Osofp8* mutant displays increased lamina joint inclination but does not show reduced length of aerial organs (Fig 1). Furthermore, *AtOFP1* is involved in GA signaling by repressing the expression of *GA20ox1*, a gene encoding a key enzyme in GA biosynthesis, but OsOFP8 is involved in BR signaling pathway and shows normal response to GA treatment (S4 Fig), indicating the functional diversity of these two genes in *Arabidopsis* and rice. *AtOFP1* is expressed in roots, shoots, vasculatures, trichomes, and in mature flowers. Similarly, OsOFP8 is expressed in roots, shoots, and inflorescences (S1 Fig). Sequence analysis of *AtOFP1* and *OsOFP8* proteins also showed different functional domains. *OVATE* domain is the common feature for all OFP proteins, besides this, *AtOFP1* contains an LXLXL motif (where L is leucine and X for any amino acid) in its *OVATE* region, which is not present in *OsOFP8*. The LXLXL motif has been shown to play an important role in repression of gene expression [2], although it only contributes marginal repression function to the *AtOFP1*.

*OsGSK2* is an ortholog of *Arabidopsis* *BIN2* gene and plays negative roles in BR signaling [20]. The expression levels of BR-biosynthesis related genes such as *OsD2* and *OsDWARF4* were increased in *OsGSK2* overexpression line and decreased in *OsGSK2* RNAi line [20]. By contrast, *OsBZR1* and *DLT* plays positive roles in BR signaling, and *OsD2* and *OsDWARF4* expression levels were induced in *OsBZR1* RNAi plants and *dlt* mutant [20, 22]. On the contrary, the expression levels of *OsD2* and *OsDWARF4* were increased in *OsOFP8* RNAi lines,

and the expression of *OsD2* was reduced in *OsOFP8* overexpression lines although in these lines *OsDWARF4* did not show much change in expression when compared to its expression in wild-type plants. BL treatment (1  $\mu$ M) increases *OsOFP8* mRNA transcript and the protein amount at the translational level (Fig 2E and 2F), at this concentration the mRNA level of *OsBZR1* and *DLT* was decreased [22, 23], suggesting *OsOFP8* behaves differently to *OsBZR1* and *DLT*.

*OsGSK2* interacts with and phosphorylates the nuclear protein *DLT* [20], but we do not know whether the interaction with *OsGSK2* causes subcellular distribution of *DLT*. *OsGSK2* interacts with and phosphorylates *OsOFP8*, phosphorylation of *OsOFP8* by *OsGSK2* is required for its cytoplasmic localization. The phosphorylated *OsOFP8* is exported from the nucleus and targeted for the proteasomal degradation in the cytoplasm. This phenomenon resembles the interaction between *BIN2* and *BZR1* [23, 30]. However, without BL treatment, *BZR1* is located mainly in the cytoplasm [30], and *BIN2* is distributed both in the nucleus and cytosol, as well as at the plasma membrane [31], but *OsOFP8* is a nuclear protein. BR signaling converts phosphorylated *BZR1* proteins to the dephosphorylated state [30], and *BIN2* protein is rapidly depleted after 30 min treatment with 1  $\mu$ M BL [32], whereas *OsOFP8* protein level is increased under this treatment (Fig 2F). In rice, binding of 14-3-3 proteins to the phosphorylated *OsBZR1* inhibits *OsBZR1* function at least in part by reducing its nuclear localization [33]. Phosphorylated *OsOFP8* may also adopt this mechanism to regulate its function. Indeed, there is a putative 14-3-3 motif in *OsOFP8* protein (S3C Fig), providing a possibility that *OsOFP8* may interact with 14-3-3 proteins to retain itself in the cytoplasm for degradation. Further studies are required to test the interaction between 14-3-3 and *OsOFP8* and the possibility of cytoplasmic retention of phosphorylated *OsOFP8* by 14-3-3 binding. Suppressing *OsBZR1* expression by RNAi leads to dwarf phenotype and reduced lamina joint bending [33], however, reducing expression level of *OsOFP8* by RNAi shows reduced lamina joint bending phenotype without dwarfism (Fig 1), suggesting *OsOFP8* may have other biological functions in addition to participating in BR signaling.

## Materials and Methods

### Plant material and growth conditions

The wild-type rice (*Oryza sativa* L.) plants Zhonghua 11 (*japonica* cv. ZH11) and *OsOFP8* transgenic plants were grown in the experimental field at South China Botanical Garden in Guangzhou during the rice growing season. The angles between the leaf blades and the culms were measured with a protractor.

### TAIL-PCR

The *Osofp8* mutant was identified from T-DNA transformation. Genomic DNA of the *Osofp8* mutant was used as the template to amplify the flanking regions of the T-DNA insertion by high-efficiency thermal asymmetric interlaced PCR [24]. The primers are listed in S1 Table.

### Vector construction

For promoter analysis, a 1983 bp promoter sequence upstream of the translation start codon of *OsOFP8* was amplified by PCR. The PCR product was digested with *EcoRI* and *NcoI*, and inserted into the pCAMBIA1391z vector to generate the Promoter<sub>*OsOFP8*</sub>:*GUS* construct. Ten independent transgenic lines were obtained and showed  $\beta$ -glucuronidase (*GUS*) activity.

To overexpress *OsOFP8*, the full-length cDNA of *OsOFP8* was PCR-amplified and inserted into the binary vector pCAMBIA1301-35S. The *OsOFP8* RNAi lines were generated by RNA

interference, using a 280 bp fragment of the *OsOFP8* coding region. The fragment was inserted into an intermediate vector as positive and inverted directions, and then the whole cassette was cut out and inserted into the binary vector pCAMBIA1301-35S. The resulting constructs of overexpression and RNAi were introduced into *Agrobacterium tumefaciens* strain EHA105, respectively, and then transformed rice ZH11. The empty vectors were also transformed into ZH11 as controls.

Full-length *OsOFP8* and *OsGSK2* cDNAs were inserted into pBI221-YFP and pBI221-3HA vectors, respectively, to generate *OsOFP8*-YFP and 3HA-*OsGSK2* constructs.

For BiFC assay, *OsGSK2* and *OsOFP8* coding sequence fragments were cloned into pSPYNE-35S and pSPYCE-35S vectors, respectively. The resulting constructs were co-transfected into protoplast cells, the transfected cells were incubated in dark for 12 h, and the fluorescence of YFP was observed.

### RNA extraction and quantitative RT-PCR

Total RNAs were isolated with Trizol reagent (Invitrogen) according to the manufacturer's instructions. Total RNAs were pre-treated with DNase I, and first-strand cDNA was synthesized from 2  $\mu$ g of total RNAs using oligo (dT)<sub>18</sub> as primers (Promega, <http://cn.promega.com/>). The first-strand cDNA product was used as template in a 20  $\mu$ L PCR reaction. For quantitative RT-PCR, SYBR Green I was added to the reaction system and run on a Roche real-time PCR detection system according to the manufacturer's instructions. The melting curve was acquired at the end. The transcript data were calculated by Roche's Software, and were normalized using *OsActin 1* as an internal control; the relative expression level was calculated by  $2^{-\Delta\Delta C_t}$ . Each experiment was performed with three replicates. The primers are listed in [S1 Table](#).

### GUS staining

GUS staining was performed according to the method as described [34]. Different tissues of the Promoter<sub>*OsOFP8*</sub>:*GUS* transgenic plants were incubated in a solution containing 50 mM NaPO<sub>4</sub> buffer pH7.0, 5 mM K<sub>3</sub>Fe(CN)<sub>6</sub>, 5 mM K<sub>4</sub>Fe(CN)<sub>6</sub>, 0.1% Triton X-100 and 1 mM X-Gluc at 37°C overnight. Images were taken under the stereomicroscope (Leica M165c).

### BR sensitivity assays

The lamina joint assay by the micro-drop method was performed as described previously [25]. A drop of ethanol (1  $\mu$ L) containing 0, 10, 100 or 1000 ng of 24-epiBL, respectively, was spotted onto the top of lamina of the seedlings which were germinated for 2 days and grown for 3 days at 30°C. Images were taken after 3 days of incubation with 24-epiBL, and the angles of lamina joint bending were measured. The lamina joint assay using excised leaf segments was performed as described previously [35]. Synchronous seeds after 2 days germination were selected and grown in the dark for 8 days at 30°C. The entire segments comprising 1 cm of the second leaf blade, the lamina joint and 1 cm of the leaf sheath were floated on distilled water for 24 h and then incubated in 2.5 mM maleic acid potassium solution containing 1  $\mu$ M 24-epiBL for 48 h in the dark. Lamina joint angles were measured, this experiment was repeated three times with similar results.

### Protoplast transient expression assay and fluorescence microscopy

For transient expression assays, typically,  $4 \times 10^4$  mesophyll protoplasts were isolated from 4-week-old *Arabidopsis* seedlings. Isolation of protoplasts and PEG-mediated transfection were as described [36]. For transient expression analysis of *OsOFP8*-YFP, 10  $\mu$ g of the plasmid

DNA were used to transfect the protoplast cells. The transfected cells were treated with 10  $\mu$ M BRZ for 12 h, and then treated with 1  $\mu$ M BL for 0, 0.5, 1 h after the removal of BRZ by washing. To test the OsGSK2-mediated cytosolic translocation of OsOFP8, plasmid DNAs containing *OsOFP8-YFP*, NLS-mCherry, and *3HA-GSK2* were co-transfected into protoplasts. After 8 h incubation, the protoplasts were incubated with or without 10  $\mu$ M MG132 for 1h. All transient transfection experiments were repeated at least three times with similar results. YFP and RFP fluorescence was observed with a confocal laser scanning microscope (ZEISS-510 Meta). The signal intensities of YFP and RFP were quantitatively determined using LSM Image Browser Rel. 4.0 software.

### Protein-protein interaction and phosphorylation analysis

For yeast two-hybrid analysis, *OsOFP8*, *OsBZR1*, *OsGAK2* and *DLT* were cloned into either pGBKT7 vector or pGADT7 vector, their combinations were tested for interaction. The reported gene assay was performed following the manufacturer's instructions (Clontech). In addition, the truncated fragments of *OsOFP8* were also ligated into pGBKT7 vector for the analysis of protein-protein interacting sites.

For Co-immunoprecipitation analysis, *OsOFP8-YFP*, *YFP*, and *3HA-OsGSK2* were co-transfected into protoplasts in different combinations as indicated. After 8 h of incubation, total cell lysates from protoplasts were prepared in IP buffer (10 mM Tris-HCl pH 7.4, 150 mM NaCl, 0.5 mM EDTA, 0.2% Nonidet P-40, 5% glycerol, 1 mM dithiois and 1 x Complete Protease Inhibitor Cocktail) and were then incubated with GFP-Trap agarose beads (ChromoTek) for 4 h at 4°C in a top to end rotator. After incubation, the beads were washed four times with ice cold washing buffer (10 mM Tris-HCl, pH7.4, 150 mM NaCl, and 0.5 mM EDTA) and then eluted by boiling in reducing SDS sample buffer. Samples were separated by SDS-PAGE and analyzed by immunoblot using appropriate antibodies.

For phosphorylation analysis, Plasmids of *OsOFP8-YFP* and *3HA-OsGSK2* were co-transfected into protoplasts. After 8 h incubation, total cell lysates from protoplasts were prepared in IP buffer (10m MTris-HCl pH 7.4, 150 mM NaCl, 0.5 mM EDTA, 0.2% Nonidet P-40, 5% glycerol, 1 mM dithiois, 1 x Phosphatase Inhibitor Cocktail, and 1 x Complete Protease Inhibitor Cocktail) and were then incubated with GFP-Trap agarose beads (ChromoTek) for 4 h at 4°C in a top to end rotator. After incubation, the beads were washed four times with ice cold washing buffer (10 mM Tris-HCl, pH 7.4, 150 mM NaCl, and 0.5 mM EDTA) and then eluted by boiling in reducing SDS sample buffer. Samples were separated by SDS-PAGE and followed by immunoblotting with biotin-pendant  $Zn^{2+}$ -Phos-tag (BTL-111) according to the manufacturer's instructions (Western Blot Analysis of Phosphorylated Proteins-Chemiluminescent Detection using BiotinylatedPhos-tag).

### Protein preparation and immunoblot analysis

Nuclear and cytoplasmic fractions in protoplasts were separated as described [37]. Protoplasts were lysed with a buffer (20 mM Tris-HCl, pH 7.0, 250 mM sucrose, 25% glycerol, 20 mM KCl, 2 mM EDTA, 2.5 mM  $MgCl_2$ , 30 mM  $\beta$ -mercaptoethanol, 1 x protease inhibitor cocktail, and 0.7% Triton X-100) and fractionated by centrifugation at 3000 g for 15 min at 4°C. The supernatant was taken as the cytosolic fraction. The pellet was further washed with a resuspension buffer (20 mM Tris-HCl, pH 7.0, 25% glycerol, 2.5 mM  $MgCl_2$ , and 30 mM  $\beta$ -mercaptoethanol) and reconstituted as the nuclear fraction. Each fraction was separated by SDS-PAGE and analyzed by Western blotting.

For total protein extraction from protoplasts, transformed protoplasts were harvested by centrifugation at 200 g for 3 min, followed by resuspension in lysis buffer containing 25 mM



Tris-HCl, pH 7.5, 150 mM NaCl, 1 mM EDTA, and 1 × protease inhibitor cocktail. The protoplasts were further lysed by vortexing for 2 min. The total cell extracts were then centrifuged at 15,000 g for 30 min at 4°C; the supernatant were total protein and analyzed by immunoblotting with appropriate antibodies [38].

## Supporting Information

### S1 Table. Primers used in this study.

(DOC)

**S1 Fig. Expression profile of *OsOFP8*.** (A) qRT-PCR analysis shows that *OsOFP8* is expressed in various tissues examined. (B–J) GUS staining of different organs from the *PRO<sub>OsOFP8</sub>:GUS* transgenic lines. Native promoter of *OsOFP8* was fused to *GUS* gene to monitor the expression pattern of *OsOFP8*. GUS activity was detected in stem node (B), leaf sheath (C), stem (D), root (E), young leaf (F), and lamina joint (G). GUS activity was also detected in young spikelets (H), stamens and ovary (I), and in the embryo of seeds (J). Bars = 2 mm.

(TIF)

**S2 Fig. Characteristics of *OsOFP8*.** (A) Schematic diagram of the N-terminal and C-terminal regions of *OsOFP8*. (B) The interaction between the N-terminal and C-terminal regions of *OsOFP8*, respectively, and the *OsGSK2* were analyzed by yeast two-hybrid analysis. (C) Feature of *OsOFP8* protein. Red letters indicate the predicted GSK3 phosphorylation sites. Green box indicates the putative 14-3-3 binding site. Underlines indicate the OVATE domain.

(TIF)

**S3 Fig. Subcellular localization of *OsOFP8*.** YFP-*OsOFP8* fusion (A) and *OsOFP8*-YFP fusion (B) were constructed to show the nuclear localization of *OsOFP8*. The nuclear marker NLS-mCherry was used as an indicator for the nucleus. Bars = 10 μm. (C) Western blotting to show the presence of co-transfected *OsOFP8* and *OsGSK2* proteins. N and C stand for the nuclear and cytoplasmic fractions, respectively. CBB represents Coomassie Brilliant Blue.

(TIF)

**S4 Fig. *OsOFP8* transgenic lines and WT plants respond similarly to GA treatment.** (A) WT (ZH11) and *OsOFP8* overexpression and RNAi transgenic plants respond similarly to 10 μM GA treatment. (B) qRT-PCR analysis shows the expression levels of *GA20ox1* gene in WT, *OsOFP8* overexpression (OE11) and *OsOFP8* RNAi (RNAi 4) lines.

(TIF)

## Acknowledgments

We thank Dr. Chengcai Chu (Institute of Genetics and Developmental Biology, Chinese Academy of Sciences, Beijing) for providing *OsGSK2* clones and materials.

## Author Contributions

Conceived and designed the experiments: JL ZT. Performed the experiments: CY WS YH. Analyzed the data: JL CY WS. Wrote the paper: JL WS ZT.

## References

1. Liu JP, Van Eck J, Cong B, Tanksley SD. A new class of regulatory genes underlying the cause of pear-shaped tomato fruit. *Proc. Natl. Acad. Sci. USA*. 2002; 99: 13302–13306. PMID: [12242331](#)
2. Wang S, Chang Y, Guo J, Chen JG. Arabidopsis Ovate Family Protein 1 is a transcriptional repressor that suppresses cell elongation. *Plant J*. 2007; 50: 858–872. PMID: [17461792](#)

3. Yu H, Jiang W, Liu Q, Zhang H, Piao M, Chen Z, et al. Expression pattern and subcellular localization of the ovate protein family in rice. *PLoS One*. 2015; 10: e0118966. doi: [10.1371/journal.pone.0118966](https://doi.org/10.1371/journal.pone.0118966) PMID: [25760462](https://pubmed.ncbi.nlm.nih.gov/25760462/)
4. Hackbusch J, Richter K, Muller J, Salamini F, Uhrig J.F. A central role of *Arabidopsis thaliana* ovate family proteins in networking and subcellular localization of 3-aa loop extension homeodomain proteins. *Proc. Natl. Acad. Sci. USA*. 2005; 102, 4908–4912. PMID: [15781858](https://pubmed.ncbi.nlm.nih.gov/15781858/)
5. Li E, Wang S, Liu Y, Chen JG, Douglas CJ. OVATE FAMILY PROTEIN4 (OFP4) interaction with KNAT7 regulates secondary cell wall formation in *Arabidopsis thaliana*. *Plant J*. 2011; 67, 328–341. doi: [10.1111/j.1365-3113X.2011.04595.x](https://doi.org/10.1111/j.1365-3113X.2011.04595.x) PMID: [21457372](https://pubmed.ncbi.nlm.nih.gov/21457372/)
6. Wang S, Chang Y, Guo J, Zeng Q, Ellis BE, Chen JG. Arabidopsis ovate family proteins, a novel transcriptional repressor family, control multiple aspects of plant growth and development. *PLoS One*. 2011; 6, e23896. doi: [10.1371/journal.pone.0023896](https://doi.org/10.1371/journal.pone.0023896) PMID: [21886836](https://pubmed.ncbi.nlm.nih.gov/21886836/)
7. Pagnussat GC, Yu HJ, Sundaresan V. Cell-fate switch of synergid to egg cell in *Arabidopsis* eostre mutant embryo sacs arises from misexpression of the BEL1-like homeodomain gene BLH1. *Plant Cell*. 2007; 19: 3578–3592. PMID: [18055603](https://pubmed.ncbi.nlm.nih.gov/18055603/)
8. Hu X, Qian Q, Xu T, Zhang Y, Dong G, Gao T, et al. The U-box E3 ubiquitin ligase TUD1 functions with a heterotrimeric G alpha subunit to regulate Brassinosteroid-mediated growth in rice. *PLoS Genet*. 2013; 9: e1003391. doi: [10.1371/journal.pgen.1003391](https://doi.org/10.1371/journal.pgen.1003391) PMID: [23526892](https://pubmed.ncbi.nlm.nih.gov/23526892/)
9. She J, Han Z, Kim TW, Cheng W, Chang W, Chang J, et al. Structural insight into brassinosteroid perception by BRI1. *Nature*. 2011; 474: 472–U496. doi: [10.1038/nature10178](https://doi.org/10.1038/nature10178) PMID: [21666666](https://pubmed.ncbi.nlm.nih.gov/21666666/)
10. Clouse SD. Brassinosteroid signal transduction: from receptor kinase activation to transcriptional networks regulating plant development. *Plant Cell*. 2011; 23: 1219–1230. doi: [10.1105/tpc.111.084475](https://doi.org/10.1105/tpc.111.084475) PMID: [21505068](https://pubmed.ncbi.nlm.nih.gov/21505068/)
11. Ye H, Li L, Yin Y. Recent advances in the regulation of brassinosteroid signaling and biosynthesis pathways. *J. Integr. Plant Biol*. 2011; 53: 455–468. doi: [10.1111/j.1744-7909.2011.01046.x](https://doi.org/10.1111/j.1744-7909.2011.01046.x) PMID: [21554539](https://pubmed.ncbi.nlm.nih.gov/21554539/)
12. Kim TW, Wang ZY. Brassinosteroid signal transduction from receptor kinases to transcription factors. *Annu. Rev. Plant Biol*. 2010; 61: 681–704. doi: [10.1146/annurev.arplant.043008.092057](https://doi.org/10.1146/annurev.arplant.043008.092057) PMID: [20192752](https://pubmed.ncbi.nlm.nih.gov/20192752/)
13. Yu X, Li L, Zola J, Aluru M, Ye H, Foudree A, et al. A brassinosteroid transcriptional network revealed by genome-wide identification of BES1 target genes in *Arabidopsis thaliana*. *Plant J*. 2011; 65: 634–646. doi: [10.1111/j.1365-3113X.2010.04449.x](https://doi.org/10.1111/j.1365-3113X.2010.04449.x) PMID: [21214652](https://pubmed.ncbi.nlm.nih.gov/21214652/)
14. He JX, Gendron JM, Yang Y, Li J, Wang ZY. The GSK3-like kinase BIN2 phosphorylates and destabilizes BZR1, a positive regulator of the brassinosteroid signaling pathway in *Arabidopsis*. *Proc. Natl. Acad. Sci. USA*. 2002; 99:10185–10190. PMID: [12114546](https://pubmed.ncbi.nlm.nih.gov/12114546/)
15. Yin Y, Wang ZY, Mora-Garcia S, Li j, Yoshida S, Asami T. et al. BES1 accumulates in the nucleus in response to brassinosteroids to regulate gene expression and promote stem elongation. *Cell*. 2002; 109: 181–191. PMID: [12007405](https://pubmed.ncbi.nlm.nih.gov/12007405/)
16. Vert G, Walcher CL, Chory J, Nemhauser JL. Integration of auxin and brassinosteroid pathways by Auxin Response Factor 2. *Proc. Natl. Acad. Sci. USA*. 2008; 105: 9829–9834. doi: [10.1073/pnas.0803996105](https://doi.org/10.1073/pnas.0803996105) PMID: [18599455](https://pubmed.ncbi.nlm.nih.gov/18599455/)
17. Wang H, Ngwenyama N, Liu Y, Walker JC, Zhang S. Stomatal development and patterning are regulated by environmentally responsive mitogen-activated protein kinases in *Arabidopsis*. *Plant Cell*. 2007; 19: 63–73. PMID: [17259259](https://pubmed.ncbi.nlm.nih.gov/17259259/)
18. Kim TW, Michniewicz M, Bergmann DC, Wang ZY. Brassinosteroid regulates stomatal development by GSK3-mediated inhibition of a MAPK pathway. *Nature*. 2012; 482: 419–422. doi: [10.1038/nature10794](https://doi.org/10.1038/nature10794) PMID: [22307275](https://pubmed.ncbi.nlm.nih.gov/22307275/)
19. Youn JH, Kim TW. Functional insights of plant GSK3-like kinases: multi-taskers in diverse cellular signal transduction pathways. *Mol. Plant*. 2015; 8: 552–565. doi: [10.1016/j.molp.2014.12.006](https://doi.org/10.1016/j.molp.2014.12.006) PMID: [25655825](https://pubmed.ncbi.nlm.nih.gov/25655825/)
20. Tong H, Li L, Jin Y, Du L, Yin Y, Qian Q, et al. DWARF AND LOW-TILLERING acts as a direct downstream target of a GSK3/SHAGGY-like kinase to mediate brassinosteroid responses in rice. *Plant Cell*. 2012; 24: 2562–2577. doi: [10.1105/tpc.112.097394](https://doi.org/10.1105/tpc.112.097394) PMID: [22685166](https://pubmed.ncbi.nlm.nih.gov/22685166/)
21. Tong H, Chu C. Brassinosteroid signaling and application in rice. *J. Genet. Genomics*. 2012; 39: 3–9. doi: [10.1016/j.jgg.2011.12.001](https://doi.org/10.1016/j.jgg.2011.12.001) PMID: [22293112](https://pubmed.ncbi.nlm.nih.gov/22293112/)
22. Tong H, Jin Y, Liu W, Li F, Fang j, Yin Y, et al. DWARF AND LOW-TILLERING, a new member of the GRAS family, plays positive roles in brassinosteroid signaling in rice. *Plant J*. 2009; 58: 803–816. doi: [10.1111/j.1365-3113X.2009.03825.x](https://doi.org/10.1111/j.1365-3113X.2009.03825.x) PMID: [19220793](https://pubmed.ncbi.nlm.nih.gov/19220793/)

23. Zhang C, Xu Y, Guo S, Zhu J, Huan Q, Liu H, et al. Dynamics of brassinosteroid response modulated by negative regulator LIC in rice. *PLoS Genet.* 2012; 8: e1002686. doi: [10.1371/journal.pgen.1002686](https://doi.org/10.1371/journal.pgen.1002686) PMID: [22570626](https://pubmed.ncbi.nlm.nih.gov/22570626/)
24. Liu YG, Chen Y. High-efficiency thermal asymmetric interlaced PCR for amplification of unknown flanking sequences. *BioTechniques.* 2007; 43: 649–650. PMID: [18072594](https://pubmed.ncbi.nlm.nih.gov/18072594/)
25. Hong Z, Ueguchi-Tanaka M, Umemura K, Uozu S, Fujioka S, Takatsuto S, et al. A rice brassinosteroid-deficient mutant, ebisu dwarf (d2), is caused by a loss of function of a new member of cytochrome P450. *Plant Cell.* 2003; 15: 2900–2910. PMID: [14615594](https://pubmed.ncbi.nlm.nih.gov/14615594/)
26. Sakamoto T, Morinaka Y, Ohnishi T, Sunohara H, Fujioka S, Ueguchi-Tanaka M, et al. Erect leaves caused by brassinosteroid deficiency increase biomass production and grain yield in rice. *Nat. biotechnol.* 2006; 24: 105–109. PMID: [16369540](https://pubmed.ncbi.nlm.nih.gov/16369540/)
27. Kinoshita E, Kinoshita-Kikuta E, Takiyama K, Koike T. Phosphate-binding tag, a new tool to visualize phosphorylated proteins. *Mol. Cell. Proteomics.* 2006; 5: 749–757 PMID: [16340016](https://pubmed.ncbi.nlm.nih.gov/16340016/)
28. Wang ZY, Nakano T, Gendron J, He J, Chen M, Vafeados D, et al. Nuclear-localized BZR1 mediates brassinosteroid-induced growth and feedback suppression of brassinosteroid biosynthesis. *Dev. Cell.* 2002; 2: 505–513. PMID: [11970900](https://pubmed.ncbi.nlm.nih.gov/11970900/)
29. Ku HM, Doganlar S, Chen KY, Tanksley SD. The genetic basis of pear-shaped tomato fruit. *Theor. Appl. Genet.* 1999; 99: 844–850.
30. Ryu H, Kim k, Cho H, Park J, Choe S, Hwang I. Nucleocytoplasmic shuttling of BZR1 mediated by phosphorylation is essential in *Arabidopsis* brassinosteroid signaling. *Plant Cell.* 2007; 19: 2749–2762. PMID: [17873094](https://pubmed.ncbi.nlm.nih.gov/17873094/)
31. Vert G, Chory J. Downstream nuclear events in brassinosteroid signalling. *Nature.* 2006; 441: 96–100. PMID: [16672972](https://pubmed.ncbi.nlm.nih.gov/16672972/)
32. Peng P, Yan Z, Zhu Y, Li J. Regulation of the *Arabidopsis* GSK3-like kinase BRASSINOSTEROID-INSENSITIVE 2 through proteasome-mediated protein degradation. *Mol. Plant.* 2008; 1: 338–346. doi: [10.1093/mp/ssn001](https://doi.org/10.1093/mp/ssn001) PMID: [18726001](https://pubmed.ncbi.nlm.nih.gov/18726001/)
33. Bai MY, Zhang LY, Gampala SS, Zhu SW, Song WY, Chong K, et al. Functions of OsBZR1 and 14-3-3 proteins in brassinosteroid signaling in rice. *Proc. Natl. Acad. Sci. USA.* 2007; 104: 13839–13844. PMID: [17699623](https://pubmed.ncbi.nlm.nih.gov/17699623/)
34. Jefferson RA. The GUS reporter gene system. *Nature.* 1989; 342: 837–838. PMID: [2689886](https://pubmed.ncbi.nlm.nih.gov/2689886/)
35. Wada K, Marumo S, Ikekawa N, Morisaki M, Mori K. Brassinolide and homobrassinolide promotion of lamina inclination of rice seedlings. *Plant Cell Physiol.* 1981; 22: 323–325.
36. Kovtun Y, Chiu WL, Tena G, Sheen J. Functional analysis of oxidative stress-activated mitogen-activated protein kinase cascade in plants. *Proc. Natl. Acad. Sci. USA.* 2000; 97: 2940–2945. PMID: [10717008](https://pubmed.ncbi.nlm.nih.gov/10717008/)
37. Yanagisawa S, Yoo SD, Sheen J. Differential regulation of EIN3 stability by glucose and ethylene signalling in plants. *Nature.* 2003; 425: 521–525. PMID: [14523448](https://pubmed.ncbi.nlm.nih.gov/14523448/)
38. Gao CJ, Yu CK, Qu S, San MW, Li KY, Lo SA, et al. The Golgi-localized *Arabidopsis* endomembrane protein12 contains both endoplasmic reticulum export and Golgi retention signals at its C terminus. *Plant Cell.* 2012; 24: 2086–2104. doi: [10.1105/tpc.112.096057](https://doi.org/10.1105/tpc.112.096057) PMID: [22570441](https://pubmed.ncbi.nlm.nih.gov/22570441/)
